# Supplementary material for: Design Proposal of a Prototype for Sawdust Pellet Manufacturing through Simulation
Source: Hindawi journal article supplement (doi:10.1155/2020/9565394), 2020-01-01
Supplement: f1 [file 9565394.f1.docx]

**SUPPLEMENTARY MATERIAL**

**Table S1. Pellet main parameters and their corresponding value**

| Parameter | Formula | Data |
| --- | --- | --- |
| 1Mass flow of sawdust () | ------ | 1220 kg/h. |
| 1Sawdust density () | ------ |  |
| 23Pellet diameter () | ------ | 6 mm |
| 23Pellet length () |  |  |
| 13Pellet volume () |  |  |
| 3Compression ratio* () |  |  |
| 1Pellet density () |  |  |

* is the ratio of effective working length and the die hole diameter.

1Campos Michelena & Manuel; Marcos Martín, Francisco. Los biocombustibles (2da. Ed.) España: Mundi Presa 2008.

2htt/www.pelletheat.org

3CEN/TS 14961: Certificación europea para biocombustibles sólidos. Especificaciones y propiedades para los pellets.

**Table S2. Formula and data of parameters related to the sawdust compression in the die**

| Parameter | Formula | Data |
| --- | --- | --- |
|  |  |  |
| 4Compacting pressure of sawdust by the roller () |  |  |
| 5Forces of sawdust compression () |  |  |
| Additional pressure required to overcome friction() * |  |  |
| 4Pressure on the die wall () ** |  |  |
| 5Friction force inside the die () |  |  |

* The minimal must be between 0.2 and 0.3 mm since it is the typical parameter used in other pelletizing machines

** = 0.7 since it is a high friction coefficient between the sawdust and the steel

4http://www.fcyt.umas.edu.bo

5<http://www.city.north.bay.on.ca> “Technical Research Center of Finland 2002”

**Table S3. Formula and data of parameters related to the roller**

| Parameter | Formula | Data |
| --- | --- | --- |
| 4Roller dimensions |  |  |
| 4Width of compacting roller () |  |  |
| Mass of roller () |  |  |
| 6The velocity of the roller () |  |  |
| 6Friction force of roller () |  |  |
| 4The total force of rollers () |  |  |
| 4Torque originated by the rollers () |  |  |

4http://www.fcyt.umas.edu.bo

5<http://www.city.north.bay.on.ca> “Technical Research Center of Finland 2002

6Hibbeler, R,C Dinamica. Prentice Hall 2006

**Table S4. Formula and data of parameters related to the matrix and work surface**

| Parameter | Formula | Data |
| --- | --- | --- |
| 6Angular velocity of the circular matrix () * |  |  |
| 6The angular displacement of work surface () ** |  |  |
| 4The angle () of displacement of the roller |  |  |
| 4Time of pellets exit () |  |  |
| 45Extrusion surface () |  |  |
| 45The velocity of extrusion () |  |  |
| 45Volumetric flow (Q) of pelletizing |  |  |
| Number of holes in the matrix |  |  |

R (Matrix radius)= 0.25 m, r (work surface radius)= 0.07 m, , , ,

4http://www.fcyt.umas.edu.bo

5<http://www.city.north.bay.on.ca> “Technical Research Center of Finland 2002

6Hibbeler, R,C Dinamica. Prentice Hall 2006

**Table S5. Formula and data related to the required power, the screw and crown**

| Parameter | Formula | Data |
| --- | --- | --- |
| 4Total power of pelletizer () |  | 41 Hp |
| 4The diameter of the worm screw () |  |  |
| 7The diameter of the helicoidal wheel () |  |  |
| Length of screw advance () |  |  |
| 7The angle of the advance of the helix ()  7The angle of the slope of the helix () | * |  |
| The face width of helicoidal wheel ()** |  |  |
| 7Number of teeth of the helicoidal wheel (Z) |  |  |
| 7Number of entries in the screw () |  |  |
| 67Screw axial path (Px) |  |  |
| 7Height of the tooth in the crown () |  |  |
| 7Reason-correction factor for reason ()** |  |  |
| 7Tangential velocity () in the diameter of the path in the worm screw |  |  |
| 67Velocity factor () ** |  |  |
| 7Tangential force () |  |  |
| 7Friction coefficient () |  |  |
| 7Friction force () |  |  |
| 7Nominal power of exit () |  |  |
| 67The power lost () due to friction in the coupling. |  |  |
| 7Nominal power of entry () |  |  |
| 7Gear efficiency () |  |  |
| 7Nominal torque of exit () |  |  |

Where C (distance between centers)= 180 mm (7.08 in), m is the modulus of gears, PC: the circumferential path of the crown, Nw: Number of entries in the screw, Ng: Number of teeth in the Crown, : height of the head, : height from the root, , is the axial force.

*When the axes are cut in 90°, the angle of the Wheel is . The inclination of the body is the same direction in the pinion and Wheel.

** According to American Gear Manufacturers Association (AGMA)

4http://www.fcyt.umas.edu.bo

6Hibbeler, R,C Dinamica. Prentice Hall 2006

7Norton, Robert, “Diseño de Maquinas”, México 2010.

**Table S6. Formula and data related to hopper design**

| Parameter | Formula | Data |
| --- | --- | --- |
| 5Internal friction angle (δ)* | --- | 33° at 10 wt.% of humidity |
| 5Material-wall friction angle (φ) |  | 26.56° |
| 5Maximum angle of conical hopper |  |  |
| Flow factor (FF) | --- | 1.75 |

* According to the EN 14961-2 standard, it was considered a 10 wt.% of humidity for calculation.

** for Black steel-sawdust

5<http://www.city.north.bay.on.ca> “Technical Research Center of Finland 2002
